# Supplementary material for: Herbicide use in water catchment areas
Source: Royal Society of Chemistry journal article supplement (doi:10.1039/d3fo01306e), 2010-07-13
Supplement: d3fo01306e1.pdf [file d3fo01306e1.pdf]

ARTICLE

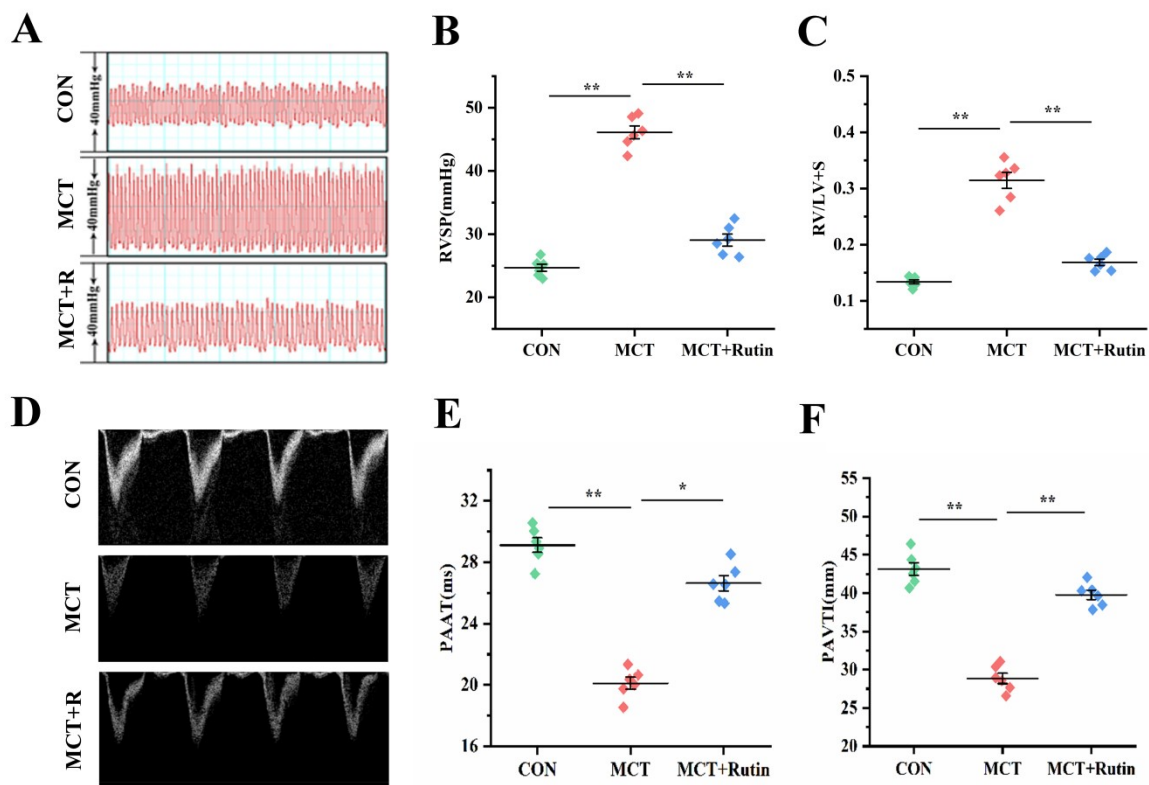

Supplementary Figure 1. Rutin played a preventive role in the progression of PAH. (A-B) The tracings and comparison of RVSP between groups. (C) The statistics of RV/LV + S ratio between groups. Echocardiographic images (D) and bar graph of PAAT (E) and PAVTI (F) in PAH rats. \*\*P<0.01, \*P<0.05. CON, control; MCT, monocrotaline; MCT+R, monocrotaline + rutin.

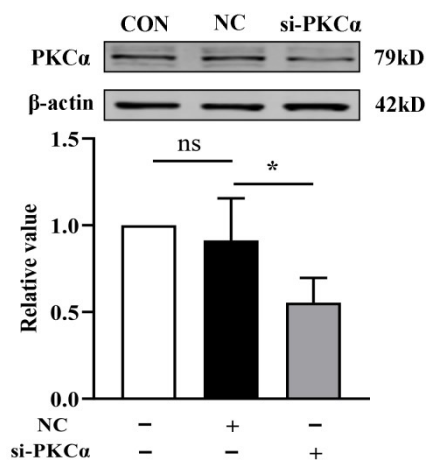

Supplementary Figure 2. The knockdown efficiency of PKC $\alpha$ .

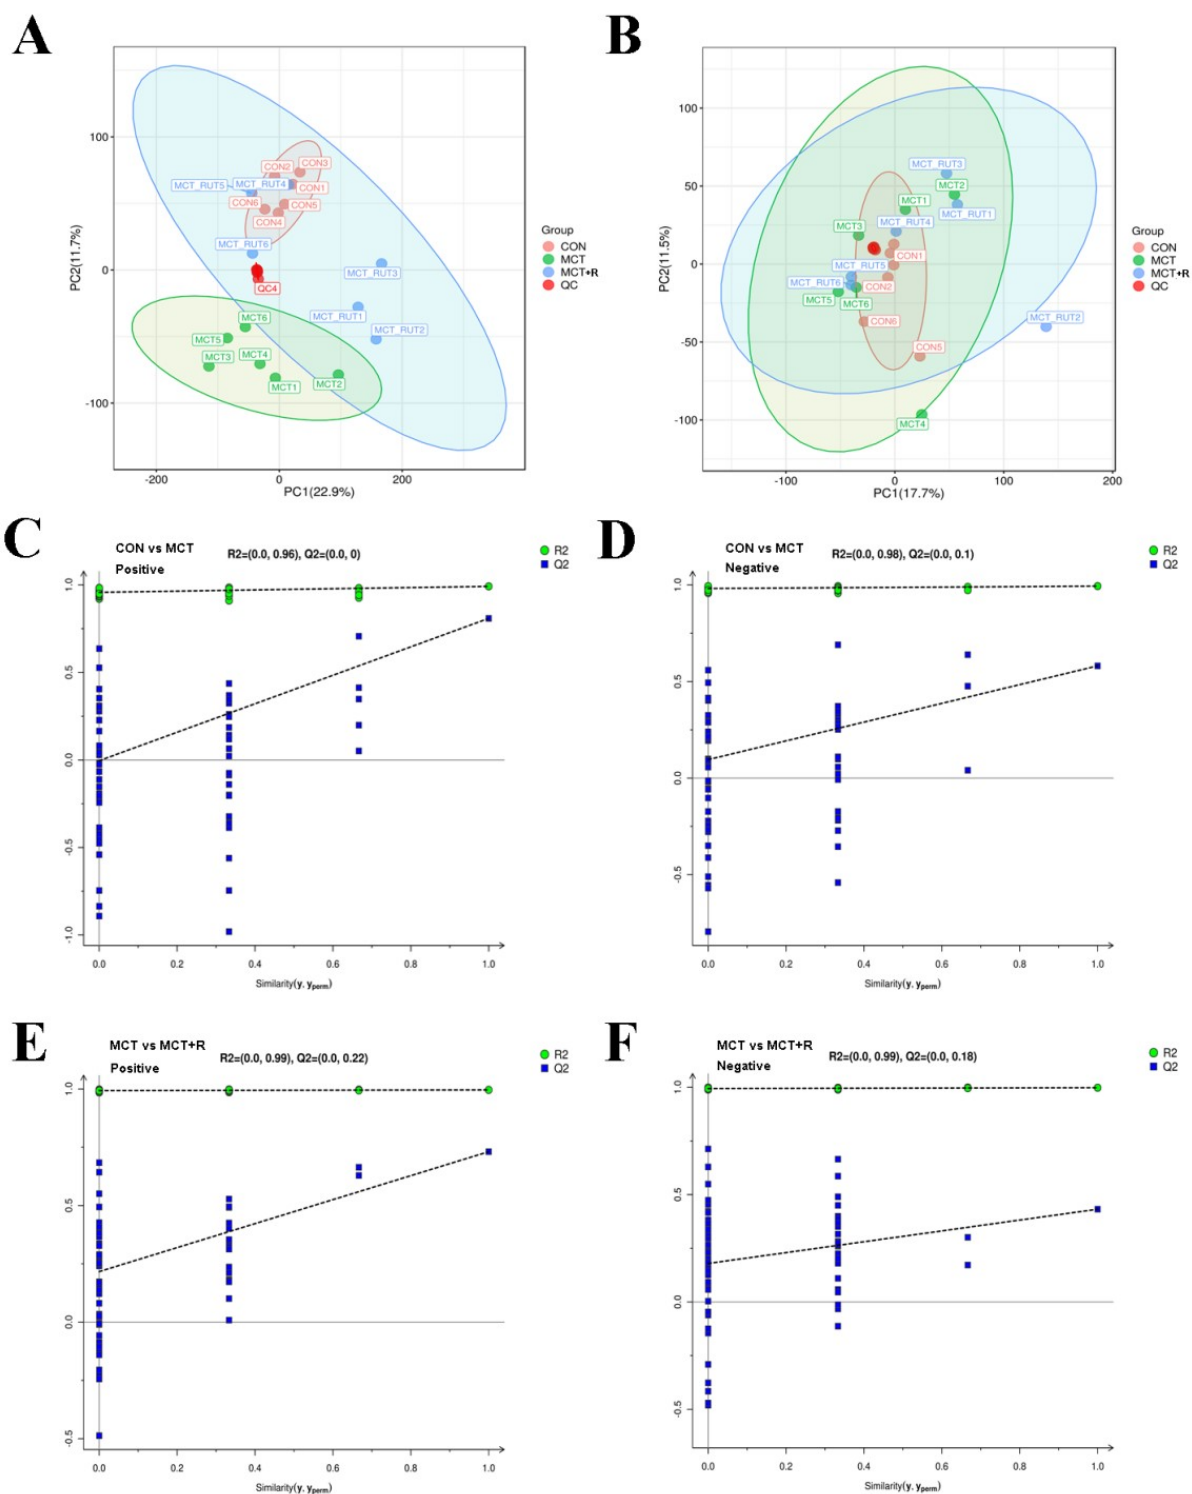

Supplementary Figure 3. Multivariate analyses of mitochondria samples from CON, MCT and MCT+R groups PCA score plots of the three groups in the (A) positive ion mode and (B) negative ion mode. (C-F) Permutation test for the OPLS-DA model. CON, control; MCT, monocrotaline; MCT+R, monocrotaline + rutin; QC, quality control.

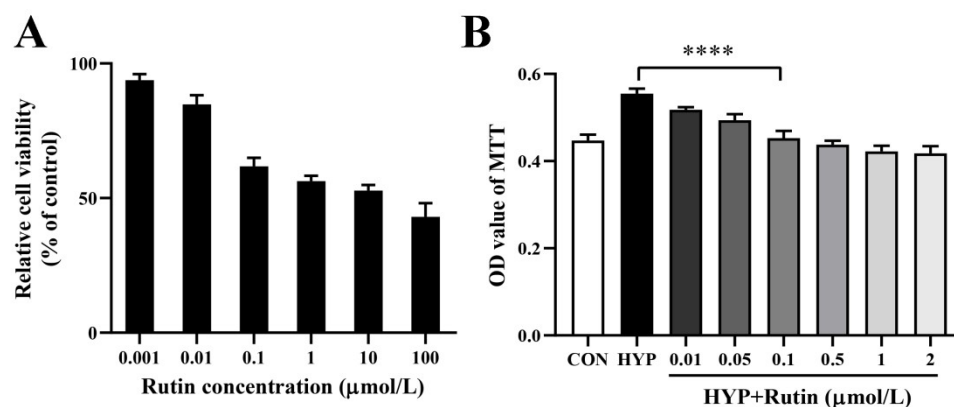

Supplementary Figure 4. Determination of concentration of rutin used for PASCs. (A) MTT assay the IC<sub>50</sub> value of the rutin in PASCs. (B) The numbers of PASCs after administering various concentrations of rutin. CON, control; HYP, hypoxia. \*\*\*\*P < 0.0001 vs. HYP.

Supplementary Table 1. LC parameters for detection of mitochondria samples

| UHPLC              | Parameters                                                                                                                       |
|--------------------|----------------------------------------------------------------------------------------------------------------------------------|
| Column             | ACQUITY UPLC® HSS T3 (150 × 2.1 mm, 1.8 μm)                                                                                      |
| Column temperature | 40 °C                                                                                                                            |
| Flow rate          | 0.25 mL/min                                                                                                                      |
| Injection volume   | 2 μL                                                                                                                             |
| Mobile phases      | A: 0.1% formic acid in water (v/v)<br>B: 0.1% formic acid in acetonitrile (v/v)<br>C: ammonium formate (5 mM)<br>D: acetonitrile |
| Gradient profile   | (time (min), A/C(%)): (0, 98), (1,98), (9,50), (12, 2), (13.5, 2), (14, 98), (20, 98)                                            |

Supplementary Table 2. MS/MS parameters for detection of mitochondria samples

| MS/MS                                    | Parameters                                 |
|------------------------------------------|--------------------------------------------|
| Sheath gas pressure                      | 30 arb                                     |
| Aux gas flow                             | 10 arb                                     |
| Spray voltage                            | 3.50 kV and -2.50 kV for ESI(+) and ESI(-) |
| Capillary temperature                    | 325 °C                                     |
| MS1 range                                | m/z 100-1000                               |
| MS1 resolving power                      | 60000 FWHM                                 |
| Number of data dependant scans per cycle | 4                                          |
| MS/MS resolving power                    | 15000 FWHM                                 |
| Normalized collision energy              | 30%                                        |
| Dynamic exclusion time, automatic.       | Automatic                                  |

Supplementary Table 3. KEGG pathway enrichment analysis of CON vs. MCT group.

| Pathways                                    | Hits | P value  |
|---------------------------------------------|------|----------|
| Glutathione metabolism                      | 2    | 0.011032 |
| Alanine, aspartate and glutamate metabolism | 2    | 0.011032 |
| Arginine and proline metabolism             | 2    | 0.019889 |
| Aminoacyl-tRNA biosynthesis                 | 2    | 0.030935 |
| Nitrogen metabolism                         | 1    | 0.035314 |
| D-Glutamine and D-glutamate metabolism      | 1    | 0.035314 |
| Ascorbate and aldarate metabolism           | 1    | 0.058236 |
| Arginine biosynthesis                       | 1    | 0.080673 |
| Butanoate metabolism                        | 1    | 0.086207 |
| Histidine metabolism                        | 1    | 0.091712 |

Supplementary Table 4. KEGG pathway enrichment analysis of MCT vs. MCT+R group.

| Pathways                                    | Hits | P value   |
|---------------------------------------------|------|-----------|
| Glutathione metabolism                      | 2    | 0.011032  |
| Alanine, aspartate and glutamate metabolism | 2    | 0.011032  |
| Arginine and proline metabolism             | 2    | 0.019889  |
| Aminoacyl-tRNA biosynthesis                 | 2    | 0.030935  |
| Nitrogen metabolism                         | 1    | 0.035314+ |
| D-Glutamine and D-glutamate metabolism      | 1    | 0.035314  |
| Ascorbate and aldarate metabolism           | 1    | 0.058236  |
| Arginine biosynthesis                       | 1    | 0.080673  |
| Butanoate metabolism                        | 1    | 0.086207  |
| Histidine metabolism                        | 1    | 0.091712  |

Supplementary Table 5. The top 10 of GO enrichment analysis of common targets between rutin and glutamate metabolism.

| GO term                                     | Subgroup             | Enrichment score |
|---------------------------------------------|----------------------|------------------|
| protein phosphorylation                     | Biological Processes | 32.71            |
| positive regulation of cell migration       | Biological Processes | 25.23            |
| regulation of kinase activity               | Biological Processes | 20.56            |
| cellular response to nitrogen compound      | Biological Processes | 20.56            |
| regulation of ion transport                 | Biological Processes | 20.56            |
| regulation of proteolysis                   | Biological Processes | 20.56            |
| regulation of cellular catabolic process    | Biological Processes | 19.63            |
| regulation of system process                | Biological Processes | 18.69            |
| positive regulation of protein localization | Biological Processes | 17.76            |
| cell activation                             | Biological Processes | 17.76            |
| perinuclear region of cytoplasm             | Cellular Components  | 15.89            |
| side of membrane                            | Cellular Components  | 14.95            |
| postsynapse                                 | Cellular Components  | 13.08            |
| axon                                        | Cellular Components  | 12.15            |
| membrane raft                               | Cellular Components  | 11.21            |
| centrosome                                  | Cellular Components  | 9.35             |
| basal plasma membrane                       | Cellular Components  | 8.41             |
| transferring phosphorus-containing groups   | Cellular Components  | 8.41             |
| cell projection membrane                    | Cellular Components  | 8.41             |
| vesicle lumen                               | Cellular Components  | 7.48             |
| protein kinase activity                     | Molecular Functions  | 29.91            |
| kinase binding                              | Molecular Functions  | 23.36            |
| oxidoreductase activity                     | Molecular Functions  | 18.69            |
| protein homodimerization activity           | Molecular Functions  | 15.89            |
| protein domain specific binding             | Molecular Functions  | 14.02            |
| hydrolase activity, acting on ester bonds   | Molecular Functions  | 12.15            |
| phosphatase binding                         | Molecular Functions  | 9.35             |
| carbonate dehydratase activity              | Molecular Functions  | 8.41             |
| calcium-dependent protein kinase C activity | Molecular Functions  | 7.48             |
| serine hydrolase activity                   | Molecular Functions  | 7.48             |

Supplementary Table 6. The top 20 of KEGG pathway enrichment analysis of common targets between rutin and glutamate metabolism.

| Pathways                                             | enrichment | Count |
|------------------------------------------------------|------------|-------|
| Pathways in cancer                                   | 21.5       | 23    |
| PI3K-Akt signaling pathway                           | 15.89      | 17    |
| Pathways of neurodegeneration - multiple diseases    | 11.21      | 12    |
| AGE-RAGE signaling pathway in diabetic complications | 10.28      | 11    |
| Lipid and atherosclerosis                            | 10.28      | 11    |
| Inflammatory mediator regulation of TRP channels     | 9.35       | 10    |
| Chemical carcinogenesis - reactive oxygen species    | 9.35       | 10    |
| Human papillomavirus infection                       | 9.35       | 10    |
| Nitrogen metabolism                                  | 8.41       | 9     |
| cGMP-PKG signaling pathway                           | 7.48       | 8     |
| Human T-cell leukemia virus 1 infection              | 7.48       | 8     |
| Platelet activation                                  | 6.54       | 7     |
| Ovarian steroidogenesis                              | 5.61       | 6     |
| Adherens junction                                    | 5.61       | 6     |
| Arachidonic acid metabolism                          | 4.67       | 5     |
| Alcoholic liver disease                              | 4.67       | 5     |
| Adrenergic signaling in cardiomyocytes               | 4.67       | 5     |
| Antifolate resistance                                | 3.74       | 4     |
| Acute myeloid leukemia                               | 3.74       | 4     |
| Folate biosynthesis                                  | 2.8        | 3     |
